# Supplementary material for: A genome-wide map of hyper-edited RNA reveals numerous new sites
Source: PubMed Central journal article supplement — Nat Commun. 2014 Aug 27;5:4726. doi: 10.1038/ncomms5726 (PMC4365171; doi:10.1038/ncomms5726), 2014-08-27
Supplement: ncomms5726-s1.pdf [file ncomms5726-s1.pdf]

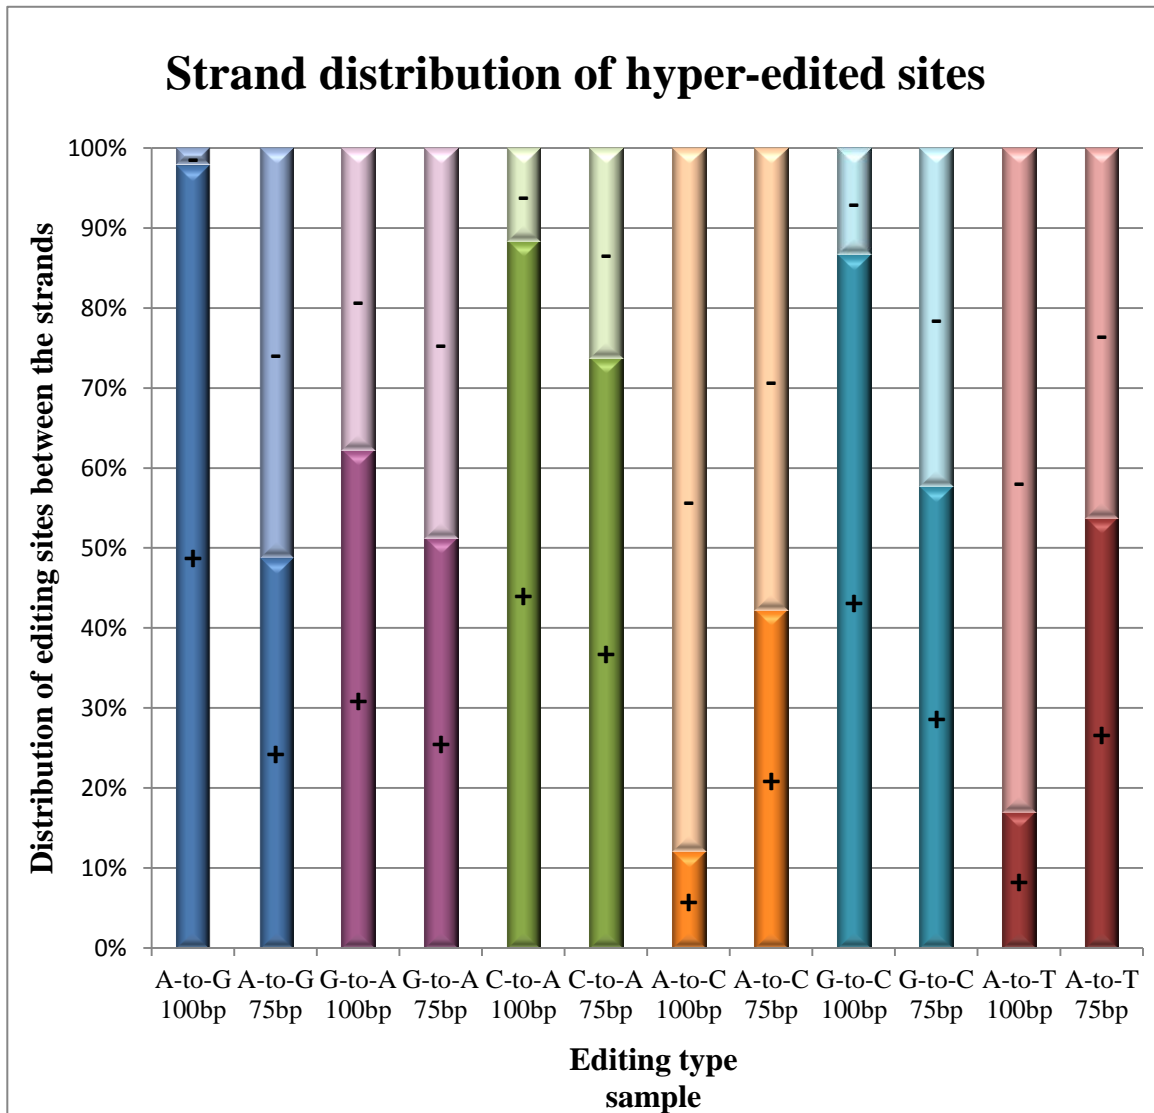

**Supplementary Figure 1. Strand distribution of the detected editing sites.** Each pair of bars of the same color refers to a specific type of mismatch and to either the 100bp or the 75bp dataset. Each bar shows the fraction of editing sites that were either (+), the specified mismatch (e.g., A-to-G), or (-), the complementary mismatch (e.g., T-to-C). The 100bp dataset was stranded (the sequenced strand was the expressed strand), whereas the 75bp dataset was not (the sequenced strand was arbitrary). Only the A-to-G sites show the expected behavior from true editing sites, namely, near 100% A-to-G preference at the stranded sample (100bp) and random distribution ( $\approx 50/50\%$ ) at the non-stranded sample.

**a**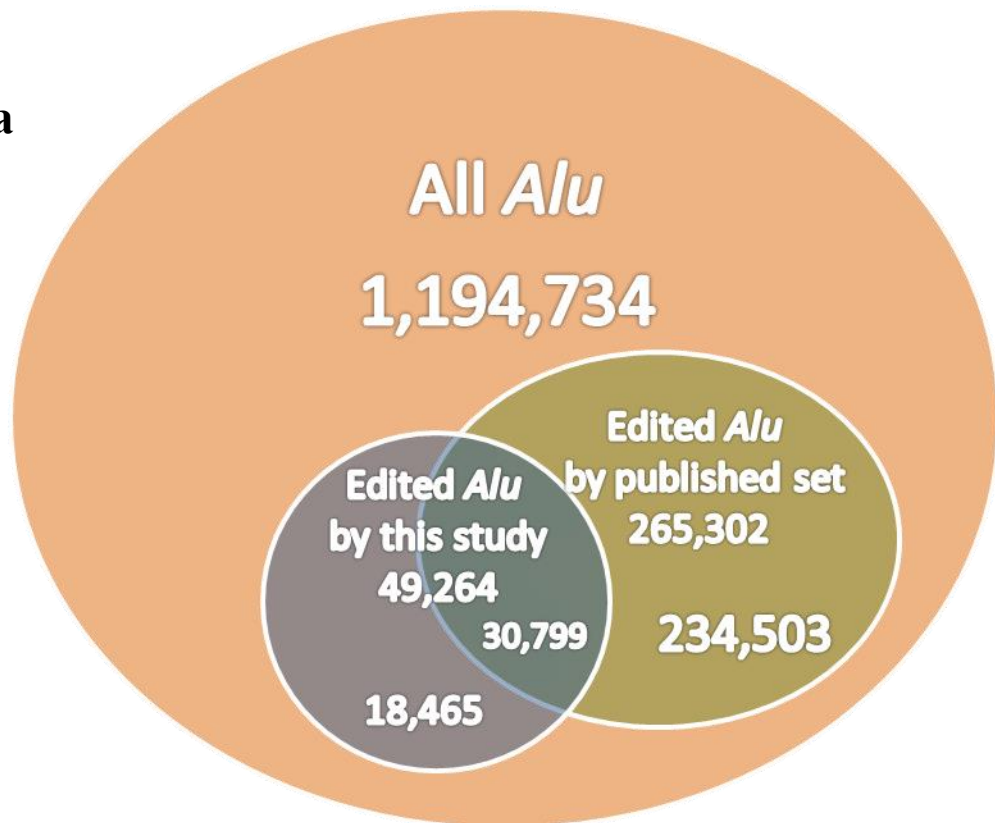**b**

|                                                                                                    | All <i>Alu</i> elements in the genome <sup>3</sup> | Moderately edited <i>Alu</i> elements <sup>3</sup> | Hyper-edited <i>Alu</i> elements <sup>3</sup> | P-Value (Wilcoxon rank sum test) <sup>4</sup> |
|----------------------------------------------------------------------------------------------------|----------------------------------------------------|----------------------------------------------------|-----------------------------------------------|-----------------------------------------------|
| <b>No. of <i>Alu</i> elements</b>                                                                  | 1,194,734                                          | 234,503                                            | 49,264                                        |                                               |
| Distance between the edited <i>Alu</i> and the nearest inverted <i>Alu</i> (bp) <sup>1</sup>       | 1845 ± 2099                                        | 1130±1449                                          | 814±1103                                      | <1×10 <sup>-300</sup>                         |
| Minimum of (no. <i>Alu</i> <sup>+</sup> , no. <i>Alu</i> <sup>-</sup> ) in the region <sup>2</sup> | 6.03 ± 4.81                                        | 7.28±4.54                                          | 8.13±4.60                                     | <1×10 <sup>-300</sup>                         |

**Supplementary Figure 2. The hyper-edited *Alus* are part of particularly long dsRNA structure.**

(a) A Venn diagram showing the overlap between the 49,264 hyper-edited *Alus* and the 265,302 edited *Alus* that were identified by Ramaswami et al. 2013, as well as the total number of *Alu* elements in the human genome (RepeatMasker). (b) Comparison of the properties of hyper-edited and moderately edited *Alus*.

<sup>1</sup>Nearest inverted *Alu* at distance <10kbp upstream or downstream.

<sup>2</sup>Regions used: ±10kb of the edited *Alu* element.

<sup>3</sup>Means are reported along with standard deviations.

<sup>4</sup>Comprising the moderately edited *Alu* to the hyper-edited *Alu*.

**a** > hg19 chrX:84346270-84346424 (+) ; APOOL 3' UTR

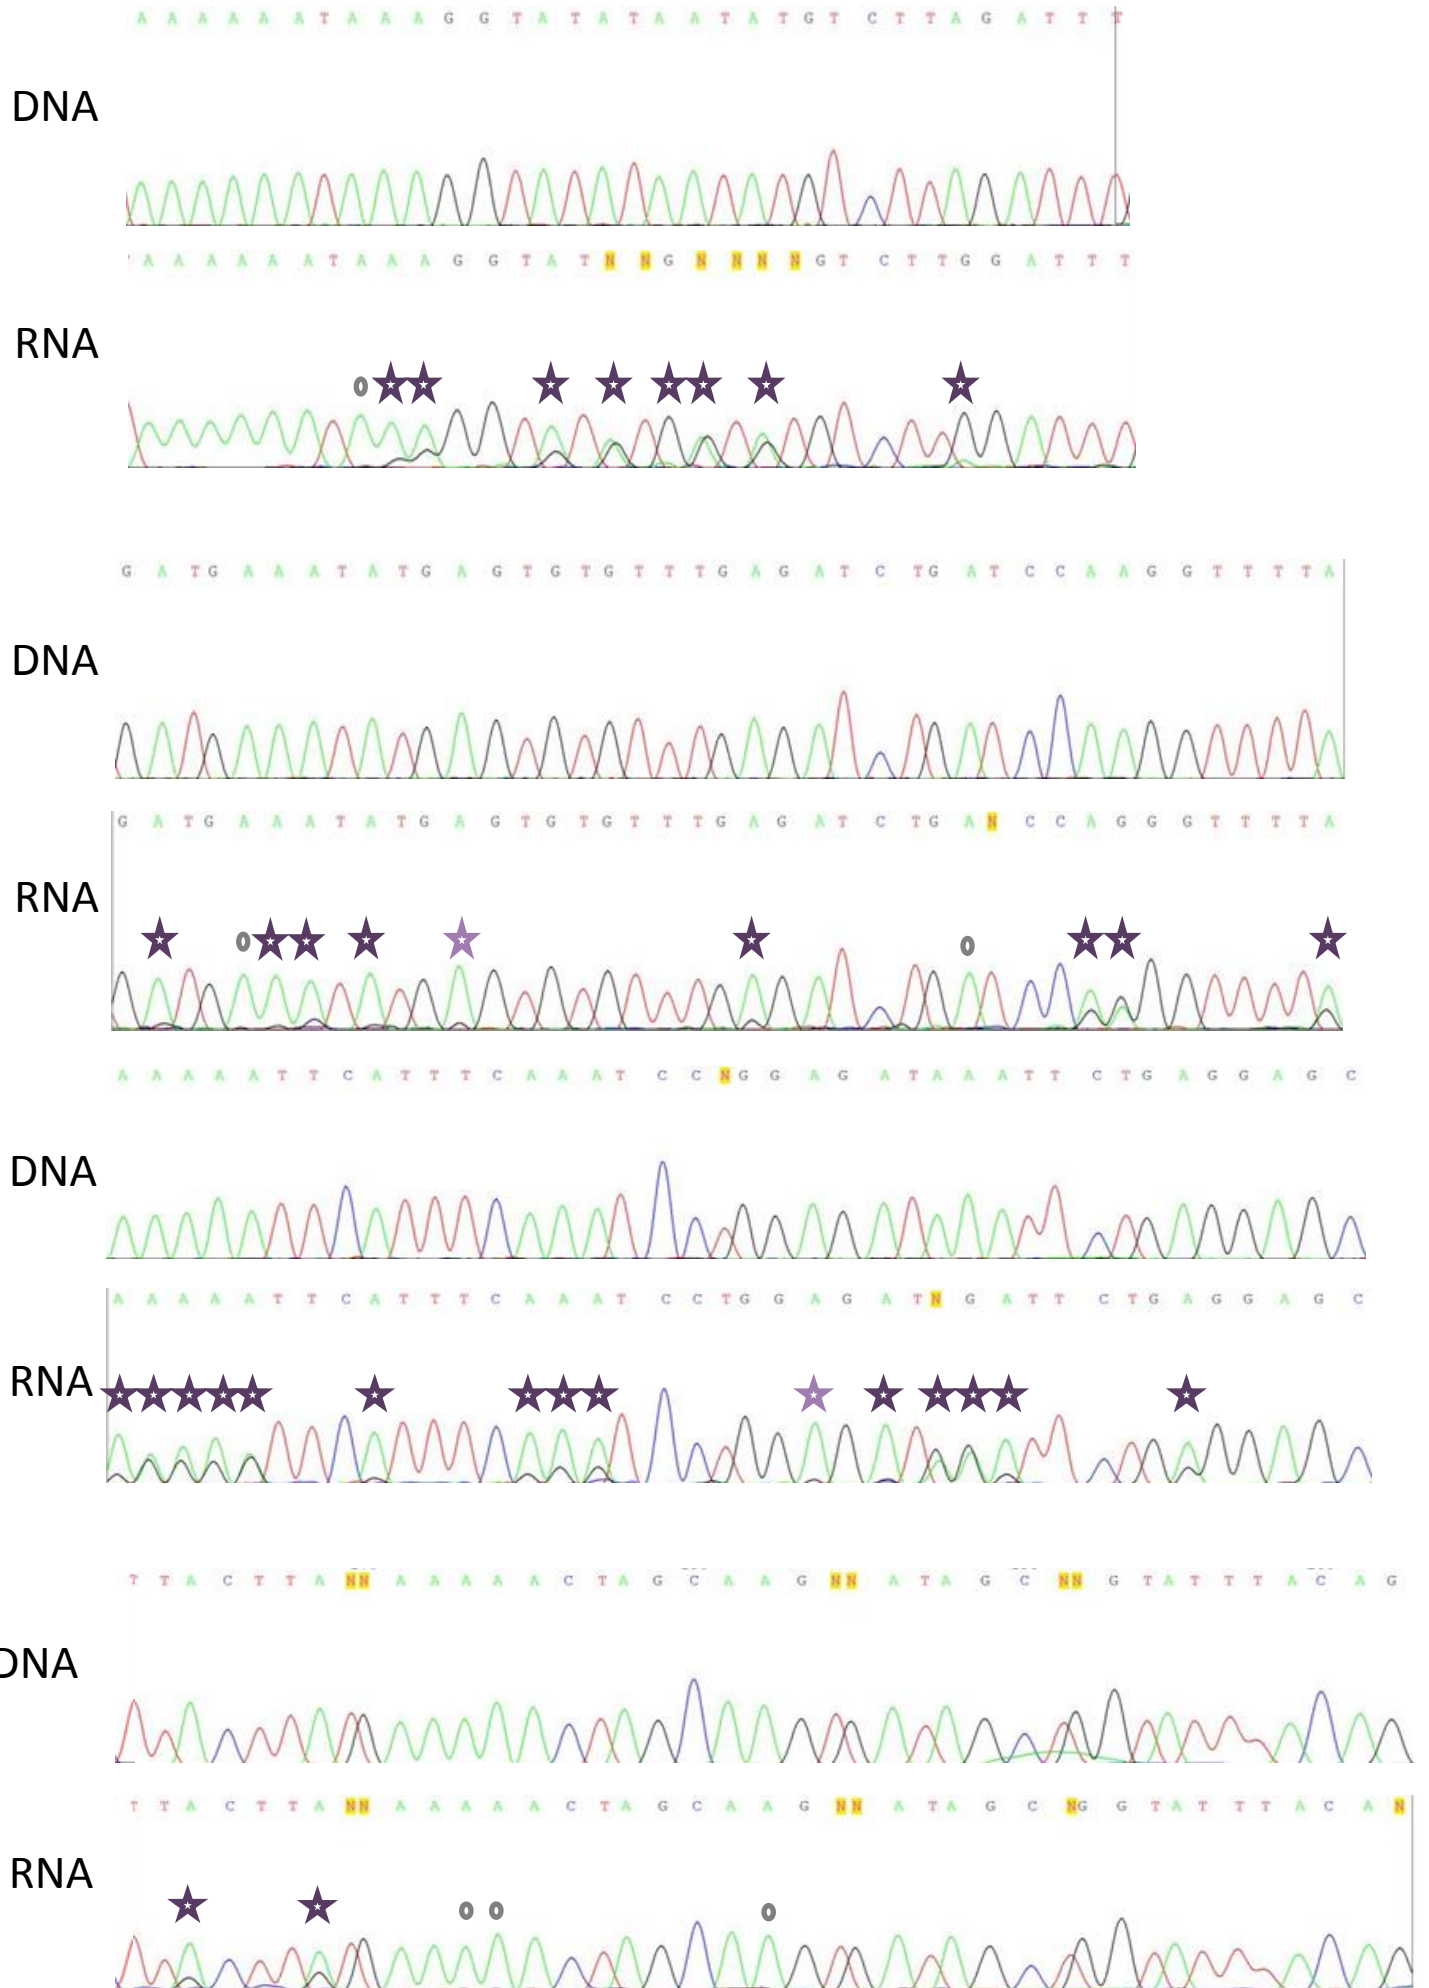

**b**

>hg19 chr12:99128730-99128890(-) ; ANKS1B 3' UTR (sense) ; APAF1 3' UTR (antisense)

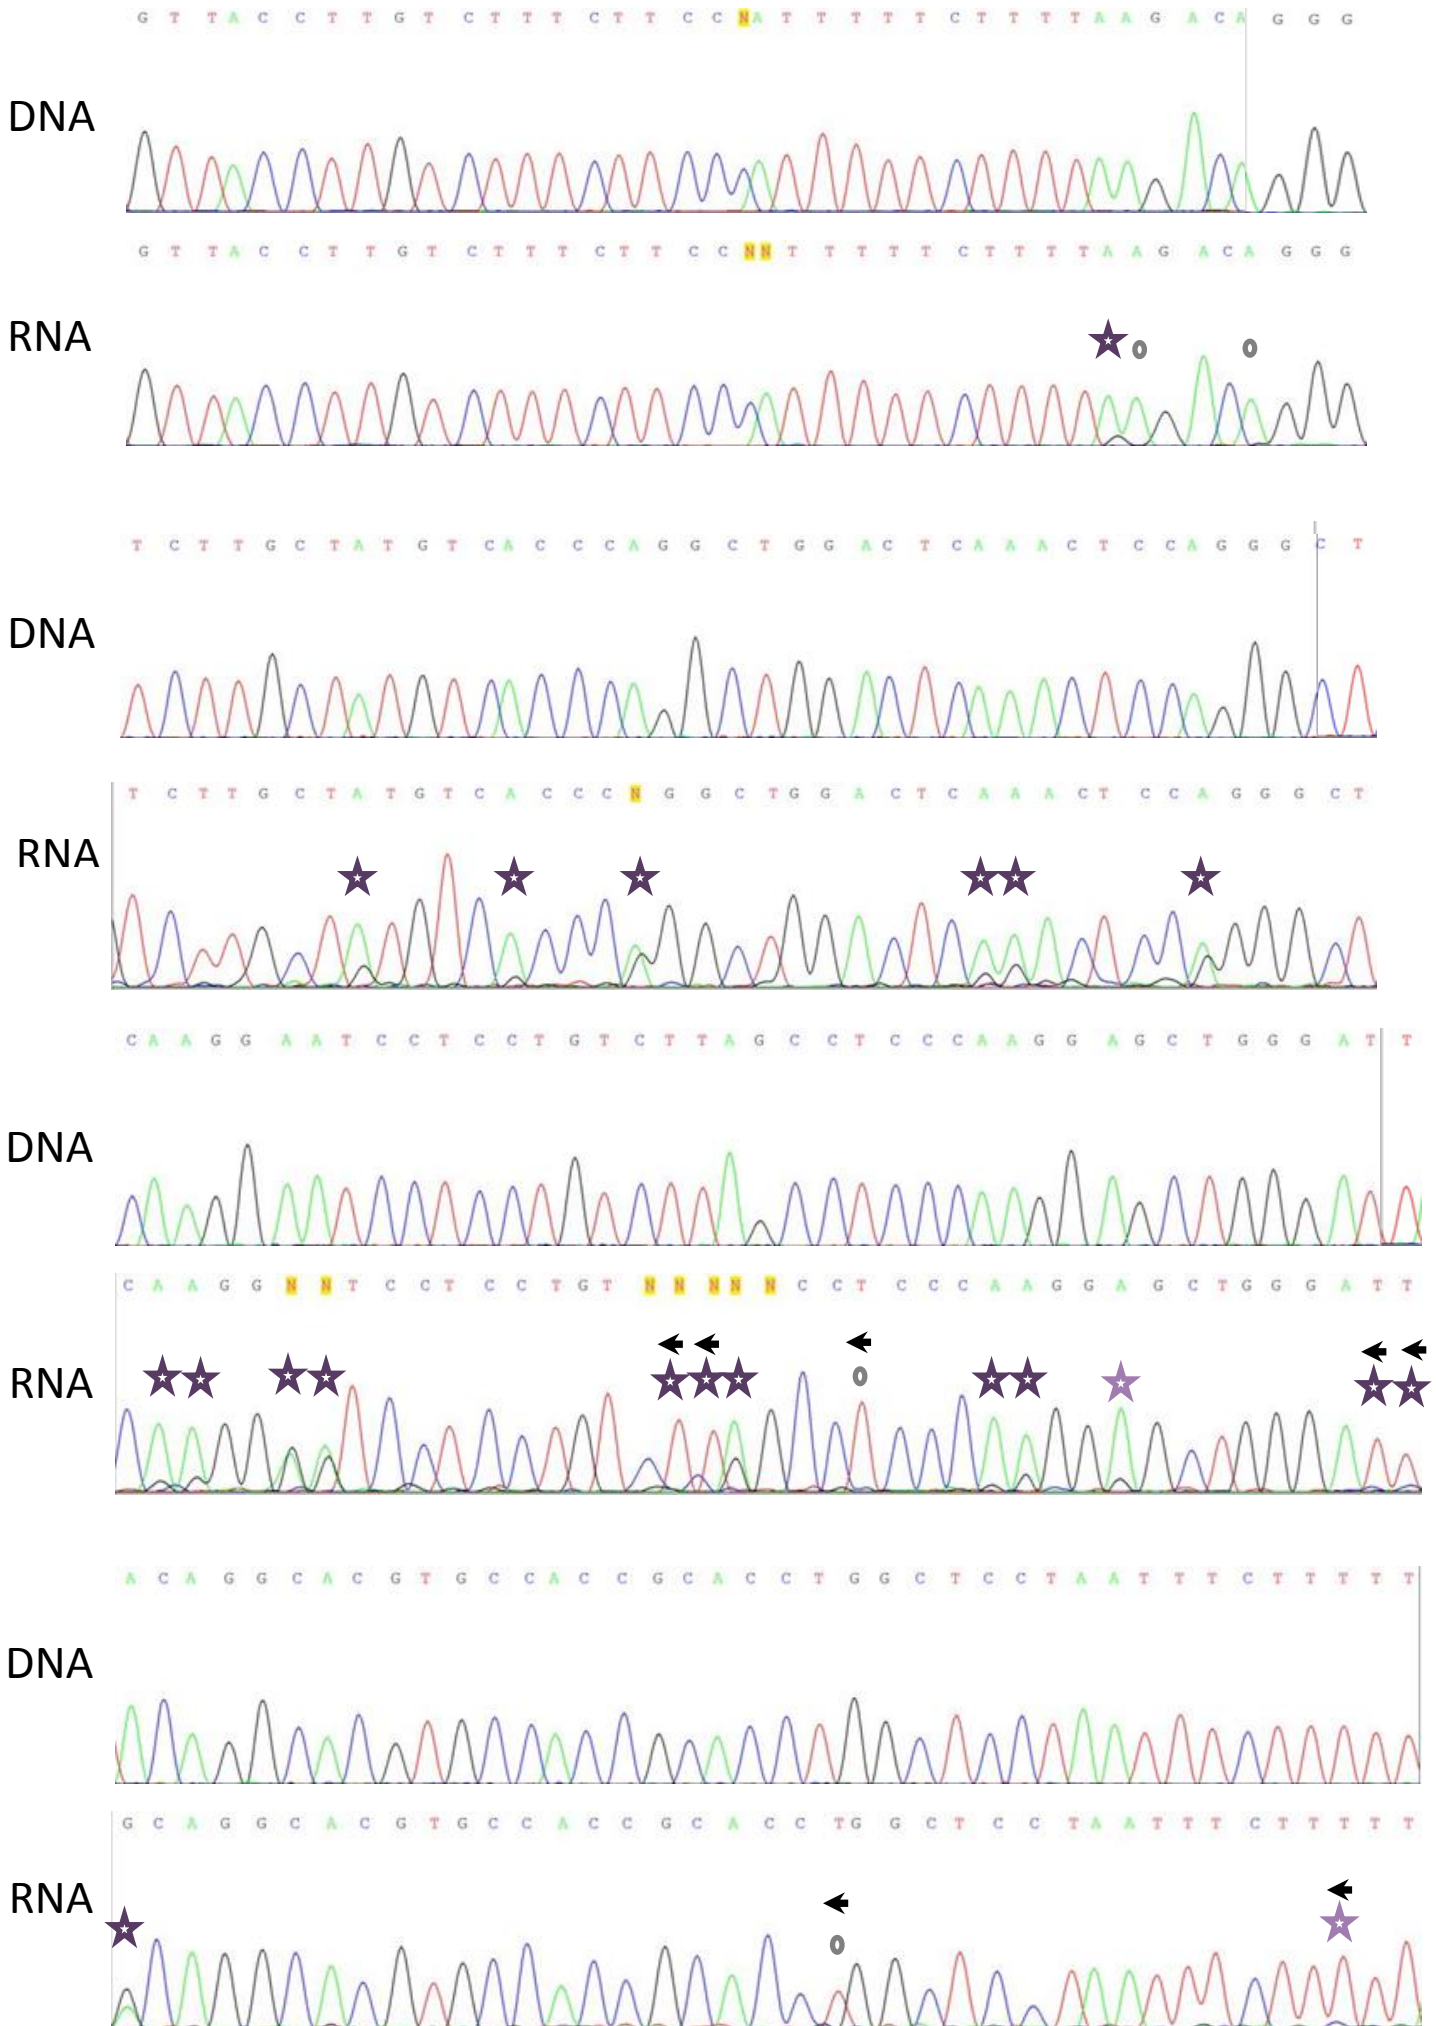

### **Supplementary Figure 3. Sanger sequencing chromatograms of hyper-edited regions.**

Chromatograms of genomic DNA are presented along with those of the corresponding cDNA (RNA). Bases are colored as: A- green, C- blue, G- black, T- red. Editing sites are evident as nucleotides having an A in the DNA and a G (or a mixed A/G signal) in the RNA. We annotated the observed editing sites that were computationally predicted with dark purple stars, and new observed editing sites with light purple stars. Grey ellipses indicate predicted sites that were not validated. **(a)** A chromatogram of chrX:84346270-84346424 (+), in the 3' UTR of the APOOL gene, which is the non-repetitive hyper-edited region presented in Figure 4 of the main text. We identified 34 editing sites (of which 32 were predicted); six sites were predicted but not validated. At the edited cluster (between the first and the last edited A), 34/39 (87.2%) of the adenosines were edited. **(b)** A chromatogram of chr12:99128730-99128890 (-), in the 3' UTR of both the ANKS1B (sense) and the APAF1 (antisense) genes. At ANKS1B (sense), where editing appears as an A in the DNA and a G (or A/G) in the RNA, we identified 16 edited sites (of which 15 were predicted); two sites were predicted but not validated. At APAF1 (antisense), where editing appears as a T in the DNA and a C (or T/C) in the RNA (indicated by backward pointing arrows), we identified five editing sites (of which four were predicted); two sites were predicted but not validated.

**Supplementary Table 1.** Hyper-editing detected in the Illumina BodyMap 75bp dataset.

| <b>Editing type</b> | <b>Hyper-edited reads (n)</b> | <b>Merged regions (n)</b> | <b>Editing sites (n)</b> | <b>Unique editing sites (n)</b> | <b>Unique editing sites (% of all types)</b> | <b>Sites overlapping with dbSNP (n)</b> | <b>Sites overlapping with dbSNP (% of all sites, for each type)</b> |
|---------------------|-------------------------------|---------------------------|--------------------------|---------------------------------|----------------------------------------------|-----------------------------------------|---------------------------------------------------------------------|
| A-to-G              | 390,881                       | 62,860                    | 2,080,519                | 455,014                         | 97.25%                                       | 7,448                                   | 1.64%                                                               |
| G-to-A              | 19,163                        | 1,169                     | 88,275                   | 7,664                           | 1.64%                                        | 831                                     | 10.84%                                                              |
| A-to-C              | 2,421                         | 272                       | 10,880                   | 1,580                           | 0.34%                                        | 100                                     | 6.33%                                                               |
| A-to-T              | 491                           | 282                       | 2,580                    | 1,528                           | 0.33%                                        | 68                                      | 4.45%                                                               |
| C-to-A              | 452                           | 231                       | 2,014                    | 1,092                           | 0.23%                                        | 63                                      | 5.77%                                                               |
| G-to-C              | 1,490                         | 197                       | 6,196                    | 1,016                           | 0.22%                                        | 115                                     | 11.32%                                                              |

**Supplementary Table 2.** Differential hyper-editing among tissues.

| <b>Tissue</b>            | <b>Hyper-edited reads</b> | <b>Hyper-edited regions</b> | <b>Enrichment<sup>1</sup></b> | <b>Unique editing sites</b> |
|--------------------------|---------------------------|-----------------------------|-------------------------------|-----------------------------|
| <b>Brain</b>             | 22,117                    | 12,650                      | 2.37                          | 75,984                      |
| <b>Adipose</b>           | 32,074                    | 10,302                      | 1.64                          | 68,677                      |
| <b>Adrenal</b>           | 28,005                    | 10,163                      | 1.61                          | 60,789                      |
| <b>Prostate</b>          | 48,479                    | 10,734                      | 1.56                          | 71,255                      |
| <b>Testes</b>            | 28,166                    | 9,918                       | 1.47                          | 63,565                      |
| <b>Lung</b>              | 46,136                    | 8,796                       | 1.33                          | 57,611                      |
| <b>Colon</b>             | 24,801                    | 7,217                       | 1.08                          | 45,174                      |
| <b>Lymph</b>             | 36,081                    | 6,551                       | 1.00                          | 38,702                      |
| <b>Ovary</b>             | 19,529                    | 6,205                       | 0.92                          | 38,876                      |
| <b>Breast</b>            | 17,232                    | 5,420                       | 0.85                          | 34,492                      |
| <b>Thyroid</b>           | 20,274                    | 5,384                       | 0.82                          | 34,171                      |
| <b>Kidney</b>            | 18,580                    | 3,783                       | 0.58                          | 23,068                      |
| <b>Liver</b>             | 7,369                     | 2,158                       | 0.34                          | 13,723                      |
| <b>Heart</b>             | 7,542                     | 1,928                       | 0.30                          | 10,636                      |
| <b>White blood cells</b> | 19,142                    | 1,714                       | 0.25                          | 10,347                      |
| <b>Skeletal muscle</b>   | 15,354                    | 916                         | 0.14                          | 5,230                       |
| <b>Total</b>             | <b>390,881</b>            | <b>103,839</b>              |                               | <b>652,300</b>              |
| <b>Unique</b>            |                           | <b>62,860</b>               |                               | <b>455,014</b>              |

<sup>1</sup>The enrichment is equal to the number of hyper-edited regions in each tissue divided by the expected number, which was computed by multiplying the total number of hyper-edited regions (over all tissues) by the ratio of the number of mapped reads in the tissue to the number of mapped reads in all tissues [2].

[2] Carmi, S., Borukhov, I. & Levanon, E. Y. Identification of widespread ultra-edited human RNAs. PLoS Genet. 7, e1002317 (2011).

**Supplementary Table 3.** Published methods discard the vast majority of editing sites

| Article                                                                                                          | Description of dataset                                                                                        | Accession numbers                             | Source reads <sup>1</sup> | Editing sites, as reported by authors | Hyper-editing sites we detected (%A-to-G of total) [novel] | Ratio of number of sites: Our screen /published article |
|------------------------------------------------------------------------------------------------------------------|---------------------------------------------------------------------------------------------------------------|-----------------------------------------------|---------------------------|---------------------------------------|------------------------------------------------------------|---------------------------------------------------------|
| <b>HUMAN</b>                                                                                                     |                                                                                                               |                                               |                           |                                       |                                                            |                                                         |
| Identifying RNA editing sites using RNA sequencing data alone (Ramaswami et al. 2013)                            | Illumina Human BodyMap 2.0 75bp SE and 50bp PE                                                                | GSE30611: ERR030888-903, ERR030872-887        | 3,821,002,610             | 370,623                               | 546,732 (95.71%) [478,739]                                 | 1.48                                                    |
| RNA editing in the human ENCODE RNA-seq data (Park et al. 2012)                                                  | ENCODE Project cell line GM12878 75bp PE                                                                      | GSM958728: SRR521447-456                      | 424,451,564               | 1,716                                 | 157,077 (96.04%) [156,104]                                 | 91.54                                                   |
| RNA editing in the human ENCODE RNA-seq data (Park et al. 2012)                                                  | ENCODE Project cell line GM12891 75bp PE                                                                      | GSM958747: SRR521531-33                       | 199,366,592               | 1,885                                 | 97,681 (98.28%) [96,712]                                   | 51.82                                                   |
| RNA editing in the human ENCODE RNA-seq data (Park et al. 2012)                                                  | ENCODE Project cell line GM12892 75bp PE                                                                      | GSM958748: SRR521534-37                       | 270,307,390               | 843                                   | 125,146 (98.35%) [124,626]                                 | 148.45                                                  |
| Comprehensive analysis of RNA-Seq data reveals extensive RNA editing in a human transcriptome (Peng et al. 2012) | Lymphoblastoid cell line (LCL) of an anonymous male Han Chinese individual (YH) PolyA+ 75 bp PE and 100 bp PE | SRS254654: SRR324678-685                      | 319,075,474               | 10,343                                | 73,463 (98.73%) [73,462]                                   | 7.10                                                    |
| Comprehensive analysis of RNA-Seq data reveals extensive RNA editing in a human transcriptome (Peng et al. 2012) | Lymphoblastoid cell line (LCL) of an anonymous male Han Chinese individual (YH) PolyA- (ss) 90 bp PE          | SRS254691: SRR324687, SRR325616 and SRR324688 | 843,673,098               | 10,770                                | 270,853 (98.81%) [270,850]                                 | 25.15                                                   |
| Accurate identification of A-to-I RNA editing in human by transcriptome sequencing (Bahn et al., 2012)           | U87MG cell line derived from a human grade IV glioma ADAR+ (ctrl) 60bp PE                                     | GSE28040 (GSM693746) SRR388226-7              | 111,160,762               | 4,141                                 | 27,124 (94.64%) [25,945]                                   | 6.55                                                    |
| <b>MOUSE</b>                                                                                                     |                                                                                                               |                                               |                           |                                       |                                                            |                                                         |
| High levels of RNA-editing site conservation amongst 15 laboratory mouse strains (Danecek et al. 2012)           | Mouse brains C57BL/6NJ strain 76bp PE                                                                         | ERP000614: ERR033015-16                       | 114,374,684               | 4,869                                 | 11,849 (96.38%) [11,811]                                   | 2.43                                                    |
| <b>FLY</b>                                                                                                       |                                                                                                               |                                               |                           |                                       |                                                            |                                                         |
| Nascent-seq indicates widespread cotranscriptional RNA editing in <i>Drosophila</i> (Rodriguez et al. 2012)      | <i>Drosophila melanogaster</i> head nascent RNA of ADAR+ strains: yw and FM7 males 101bp SE                   | GSE37232: GSM914114-7                         | 257,255,489               | 1,350                                 | 39,472 (99.87%) [39,334]                                   | 29.24                                                   |

<sup>1</sup> Paired-end reads were counted as two single-end reads.



**Supplementary Table 4.** Identification of hyper-edited RNAs in different species

| Species           | Reference                                                                                              | Description                                | Accession numbers         | Source reads <sup>1</sup><br>[Mapped reads] | Editing sites<br>(% A-to-G of total) | Editing sites per mapped read |
|-------------------|--------------------------------------------------------------------------------------------------------|--------------------------------------------|---------------------------|---------------------------------------------|--------------------------------------|-------------------------------|
| <b>Human</b>      | Illumina Human BodyMap project 2.0                                                                     | Homo sapiens brain <sup>2</sup><br>75bp SE | ERR030890                 | 64,313,204<br>[59,130,196]                  | 75,984<br>(98.93%)                   | $1.3 \cdot 10^{-3}$           |
| <b>Mouse</b>      | High levels of RNA-editing site conservation amongst 15 laboratory mouse strains (Danecek et al. 2012) | Mus musculus brain<br>76bp PE              | ERP000614:<br>ERR033015-6 | 114,374,684<br>[103,507,244]                | 11,849<br>(96.38%)                   | $1.1 \cdot 10^{-4}$           |
| <b>Rat</b>        | Evolutionary dynamics of gene and isoform regulation in Mammalian tissues (Merkin et al. 2012)         | Rattus norvegicus brain<br>80bp PE         | GSM1020666                | 238,077,800<br>[199,514,577]                | 21,761<br>(93.61%)                   | $1.1 \cdot 10^{-4}$           |
| <b>Opossum</b>    | The evolution of gene expression levels in mammalian organs (Brawand, D. et al. 2011)                  | Monodelphis domestica brain<br>76bp SE     | GSM752590                 | 22,273,667<br>[14,411,371]                  | 1,563<br>(89.88%)                    | $1.1 \cdot 10^{-4}$           |
| <b>Drosophila</b> | Nascent-seq indicates widespread cotranscriptional RNA editing in Drosophila (Rodriguez et al. 2012)   | Drosophila melanogaster head<br>101bp SE   | GSE37232:<br>GSM914114-7  | 257,255,489<br>[248,984,465]                | 39,472<br>(99.87%)                   | $1.6 \cdot 10^{-4}$           |

<sup>1</sup> Paired-end reads were counted as two single-end reads.

<sup>2</sup> Values are reported only for the brain-derived subset of reads, to facilitate comparison with the other species.

**Supplementary Table 5.** Targets and primers for direct sequencing validation.

| <b>Amplified region [size]</b>              | <b>Primer sequences (5' to 3') (top row: left, bottom row: right)</b> | <b>Functional region [Repeat element]</b> | <b>Annealing T<sub>m</sub></b> | <b>Gene name</b> | <b>Number of observed editing sites [cluster size<sup>1</sup>]</b> |
|---------------------------------------------|-----------------------------------------------------------------------|-------------------------------------------|--------------------------------|------------------|--------------------------------------------------------------------|
| chr4:<br>89181173-<br>89181565<br>[393bp]   | GCATTCAAACAAAAATGAAACCTGC                                             | 3'UTR<br>[Alu]                            | 66°C                           | PPM1K            | 23<br>[252bp]                                                      |
|                                             | CCAAACCAACAGGCAAAGGA                                                  |                                           |                                |                  |                                                                    |
| chr1:<br>145511836-<br>145512201<br>[366bp] | TGTGAGGAGTATAAAAATAGTCAAAGC                                           | 3'UTR/ intron<br>[Alu]                    | 62°C                           | NBPF10/<br>RBM8A | 21<br>[252bp]                                                      |
|                                             | TGGACCAAACCTATAAATCCAAGAGC                                            |                                           |                                |                  |                                                                    |
| chr14:<br>31563509-<br>31563791<br>[283bp]  | AAGCTTTGTAATGTGGGGCT                                                  | 3'UTR<br>[Alu]                            | 62°C                           | AP4S1            | 11<br>[113bp]                                                      |
|                                             | TTTCACTCTGTCACCCAGGC                                                  |                                           |                                |                  |                                                                    |
| chr12:<br>99128610-<br>99128962<br>[353bp]  | GGGGCTCATCTCATGTAGGC                                                  | 3'UTR<br>[Alu]                            | 66°C                           | ANKS1B (-)       | 16 (-) <sup>2</sup><br>[92bp]                                      |
|                                             | CCTCTTGACCGACTGCATGA                                                  |                                           |                                | APAF1 (+)        | 5 (+) <sup>2</sup><br>[63bp]                                       |
| chrX:<br>84346226-<br>84346481<br>[256bp]   | AGCCTGGGCACAAGAACAAA                                                  | 3'UTR<br>[NonRep]                         | 62°C                           | APOOL            | 34 <sup>2</sup><br>[161bp]                                         |
|                                             | CAAGGAACCTTGTCTGTGAGA                                                 |                                           |                                |                  |                                                                    |
| chr10:<br>15118871-<br>15119501<br>[631bp]  | AGCCAAAAGAACAAACAGCTGT                                                | 3'UTR/ intron<br>[RepNonAlu]              | 64°C                           | ACBD7            | 10<br>[179bp]                                                      |
|                                             | AATTGCTCATCCCTCACCCC                                                  |                                           |                                |                  |                                                                    |
| chr1:<br>149913606-<br>149913817<br>[212bp] | TCTCAGTCCTGTCAGATCCTGT                                                | 3'UTR<br>[RepNonAlu]                      | 62°C                           | OTUD7B           | 11<br>[43bp]                                                       |
|                                             | GCAGTGAGATTCCAAAGGAAGG                                                |                                           |                                |                  |                                                                    |

<sup>1</sup> The number of bases between the first and the last edited A.

<sup>2</sup> Chromatograms of the Sanger sequencing are presented in Supplementary Figure 3.
